# Supplementary material
Source: HighWire-hosted journal article supplement (https://cmaj.ca/highwire/filestream/78598/field_highwire_adjunct_files/3/202604-res-4-at.pdf)

## Appendix 4. Forest plots of summary crude odds ratio (OR) for the association between COVID-19 and pregnancy outcomes using random-effects models

### 4.1 COVID-19 vs no COVID-19

#### 4.1.1 Association of COVID-19 with preeclampsia

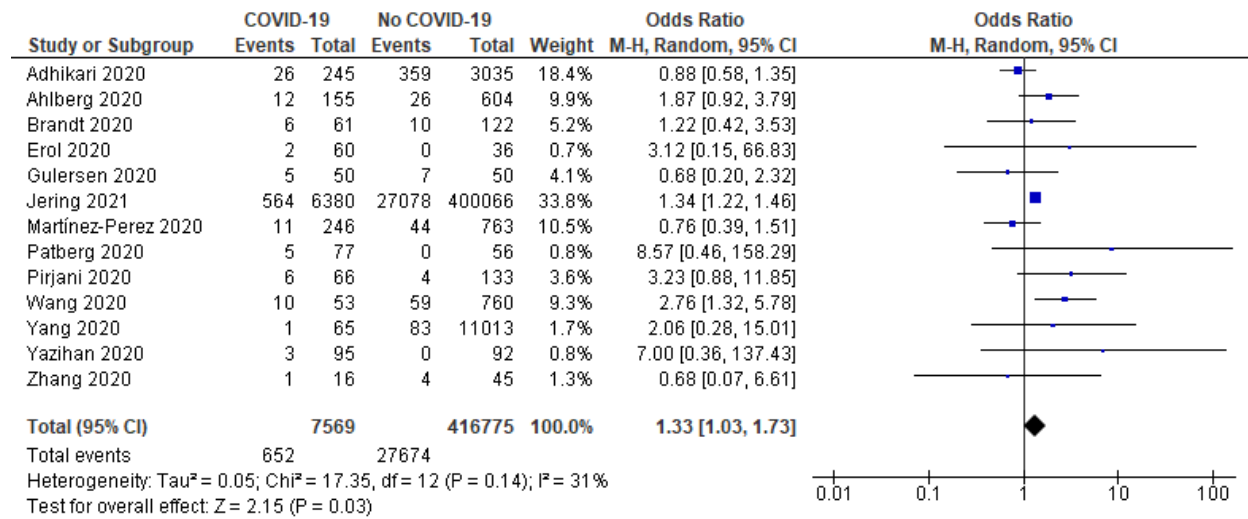

#### 4.1.2 Association of COVID-19 with gestational diabetes

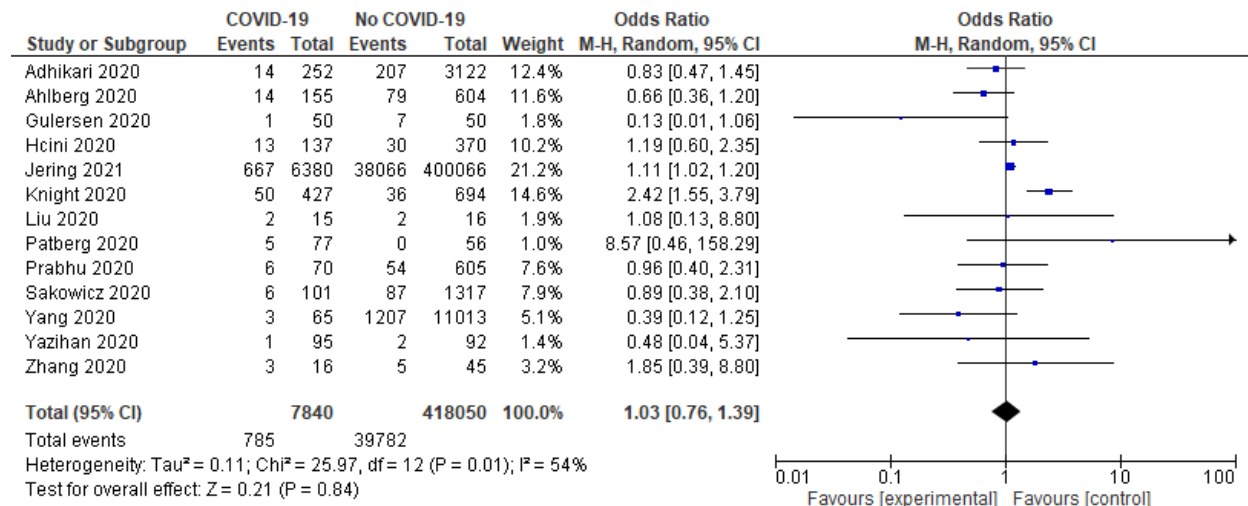

#### 4.1.3 Association of COVID-19 with fetal distress

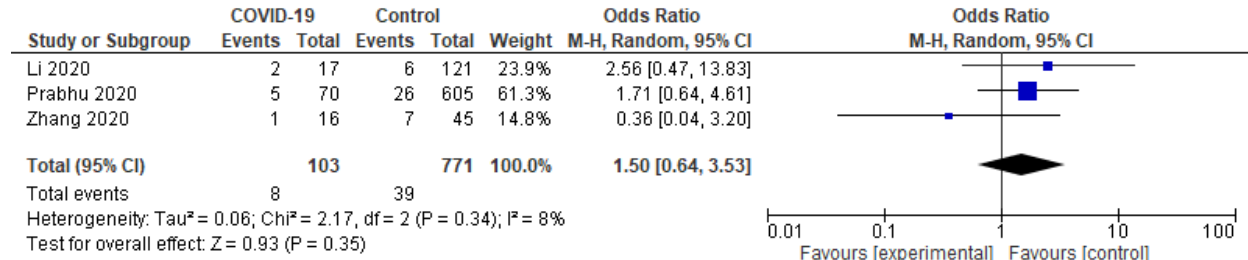

#### 4.1.4. Association of COVID-19 with stillbirth

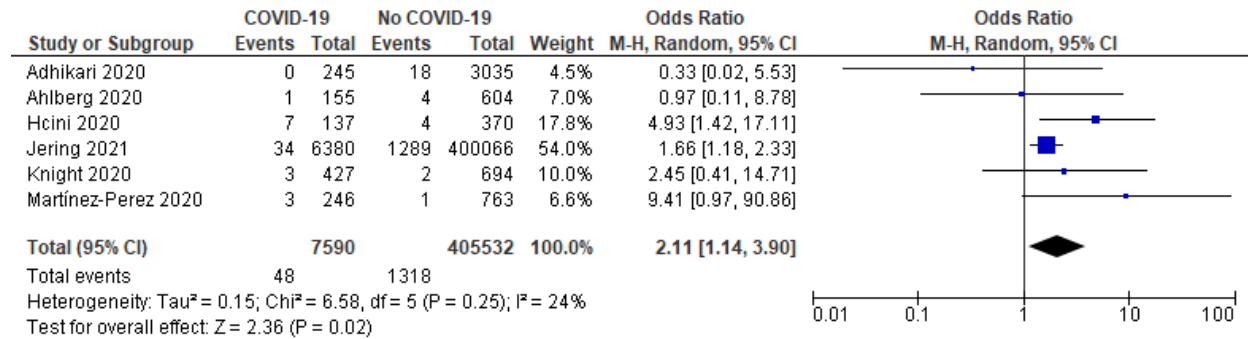

#### 4.1.5. Association of COVID-19 with chorioamnionitis or intra-amniotic infection

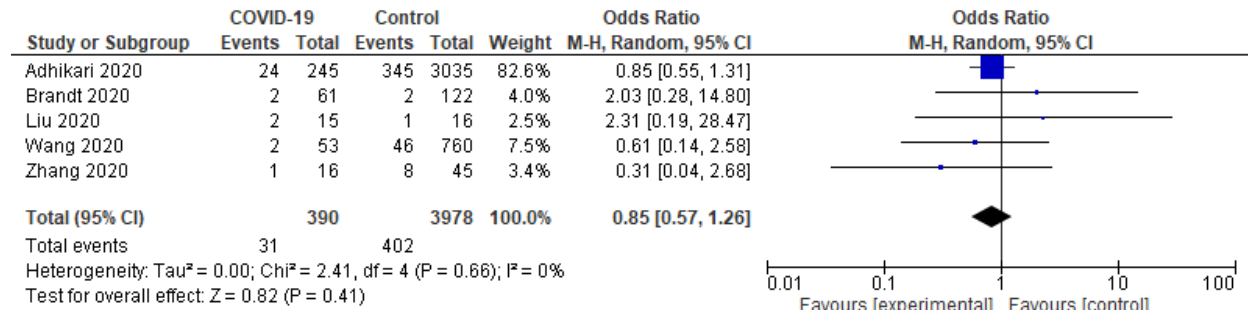

#### 4.1.6. Association of COVID-19 with intensive care unit (ICU) admission

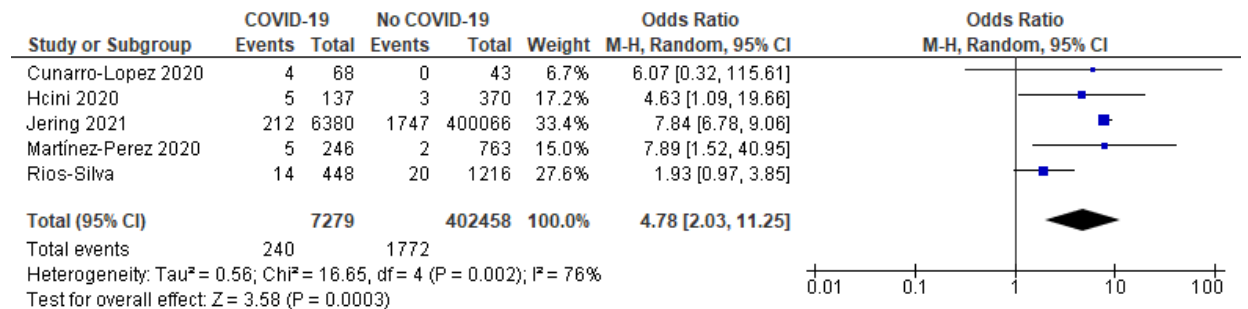

#### 4.1.7. Association of COVID-19 with cesarean delivery

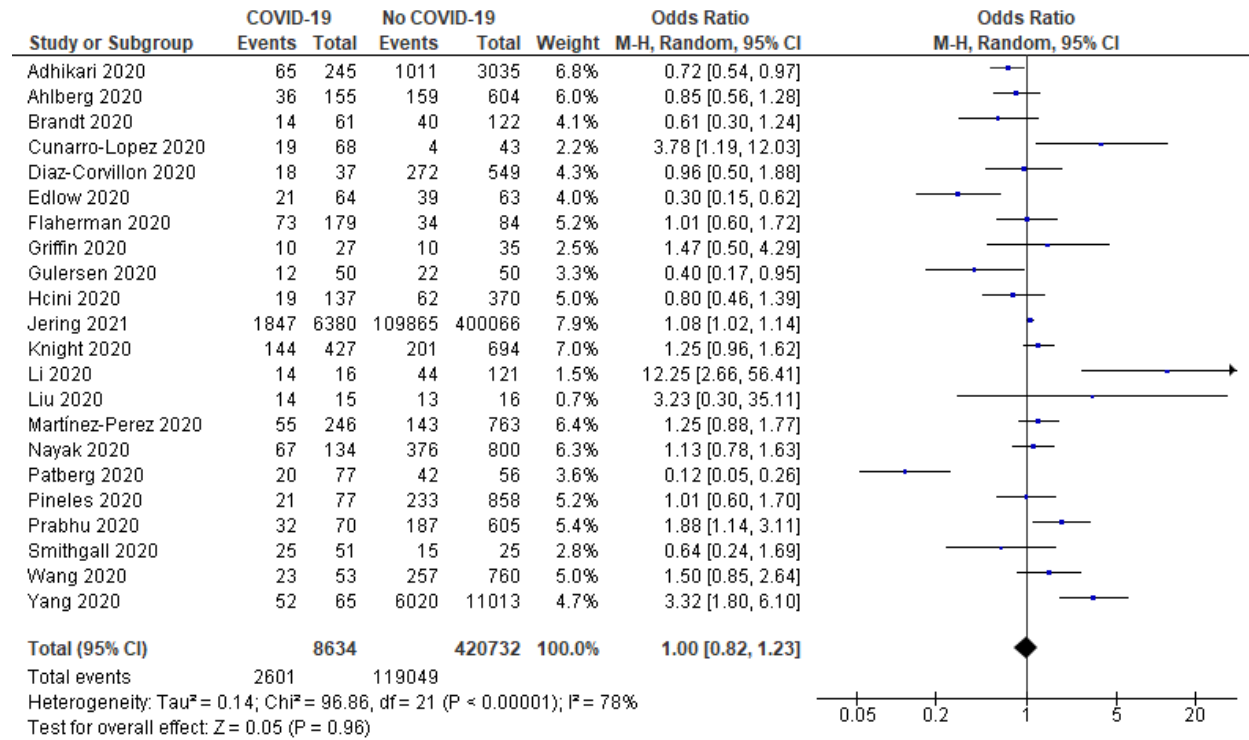

#### 4.1.8. Association of COVID-19 with postpartum hemorrhage

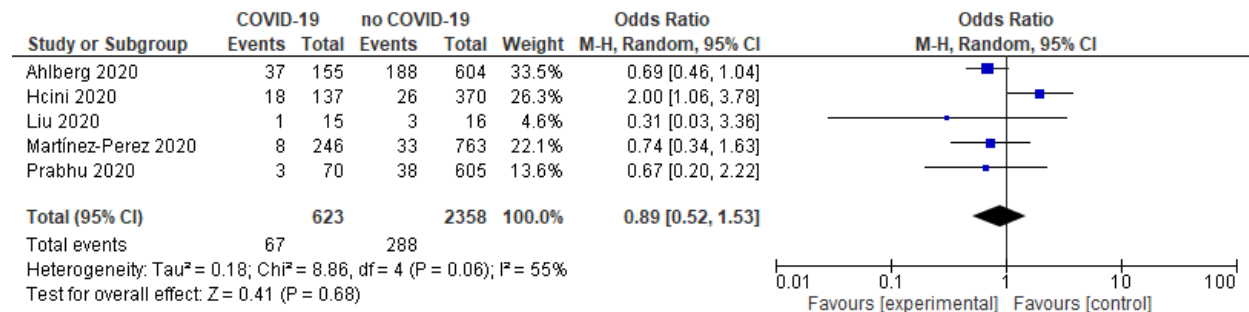

#### 4.1.9. Association of COVID-19 with preterm birth

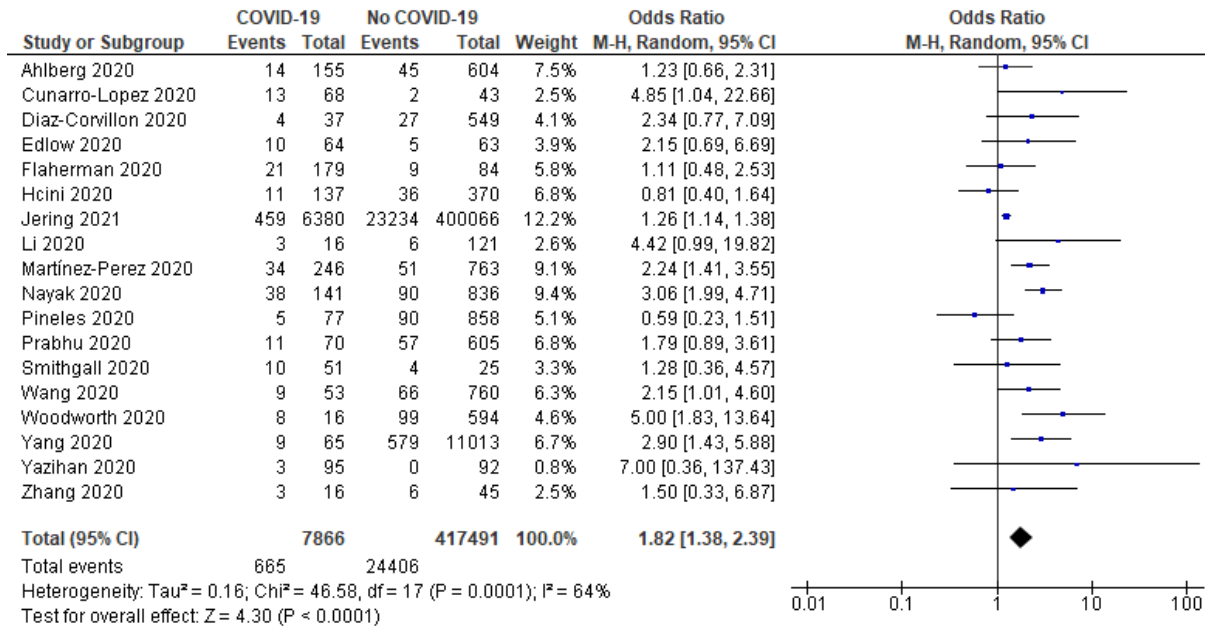

#### 4.1.10. Association of COVID-19 with neonatal sex (male)

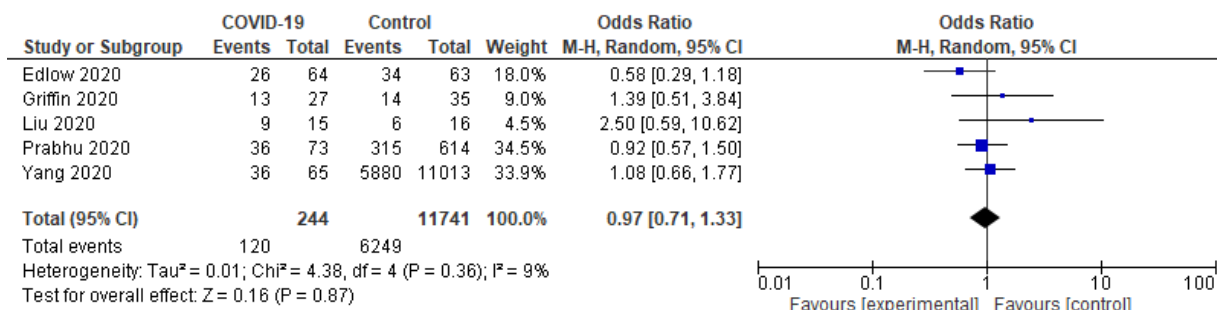

#### 4.1.11. Association of COVID-19 with gestational age at birth (weeks)

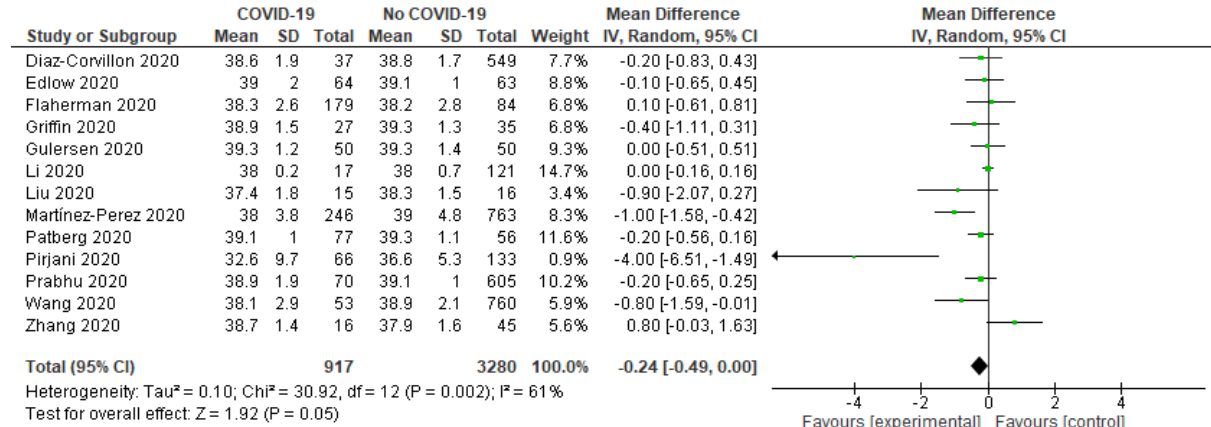

#### 4.1.12. Association of COVID-19 with birth weight (grams)

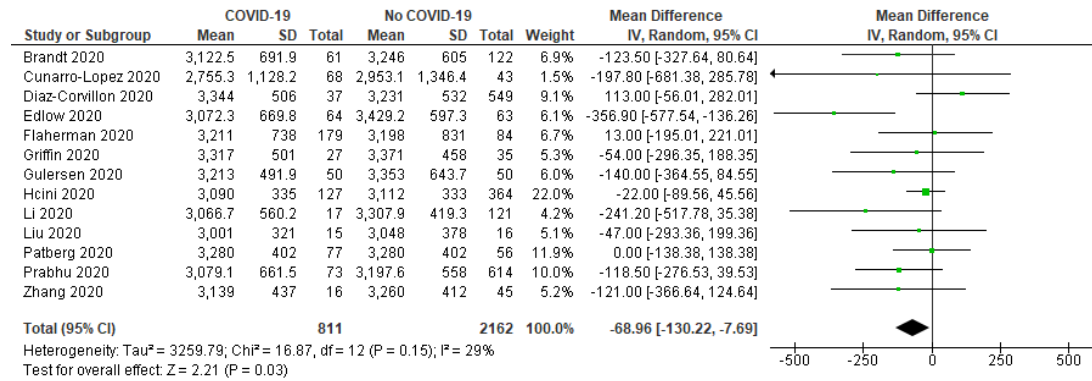

#### 4.1.13. Association of COVID-19 with low birth weight

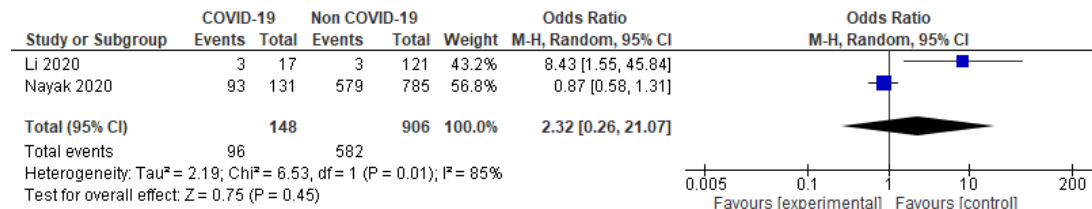

#### 4.1.14. Association of COVID-19 with neonatal intensive care unit (NICU) admission

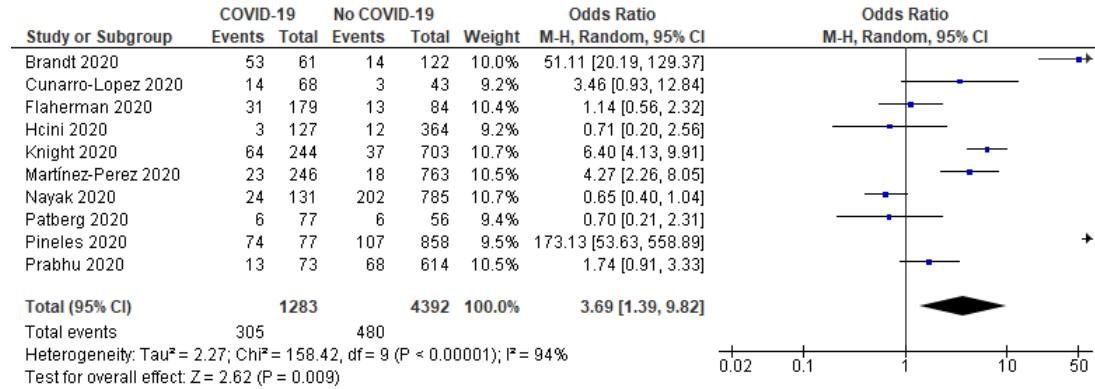

#### 4.1.15. Association of COVID-19 with neonatal death

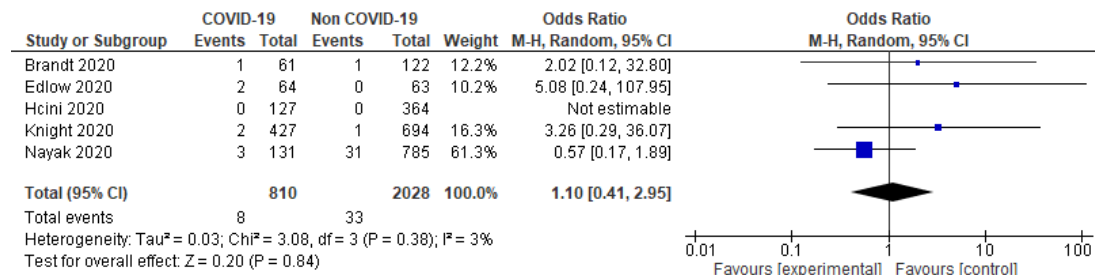

### 4.2 Symptomatic COVID-19 vs asymptomatic COVID-19

#### 4.2.1. Association of symptomatic COVID-19 with gestational hypertension or preeclampsia

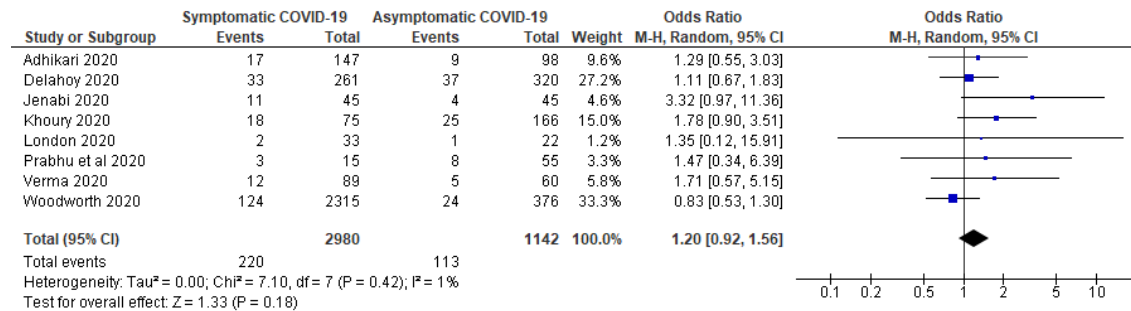

#### 4.2.2. Association of symptomatic COVID-19 with gestational diabetes

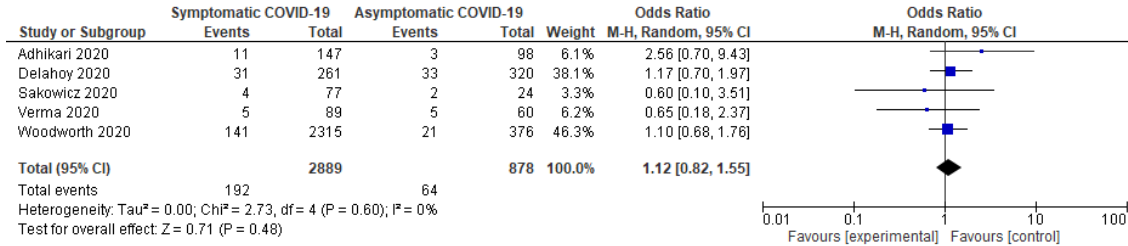

#### 4.2.3. Association of symptomatic COVID-19 with mechanical ventilation

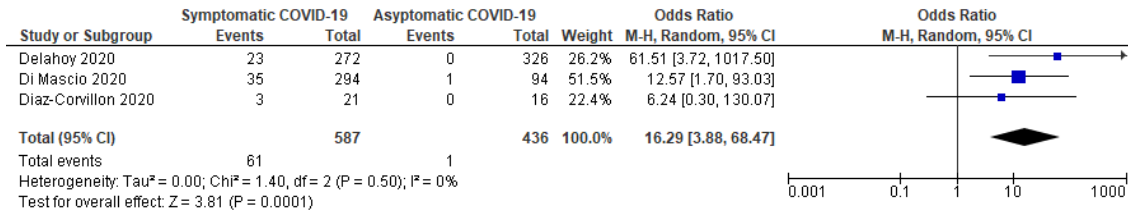

#### 4.2.4. Association of symptomatic COVID-19 with intensive care unit (ICU) admission

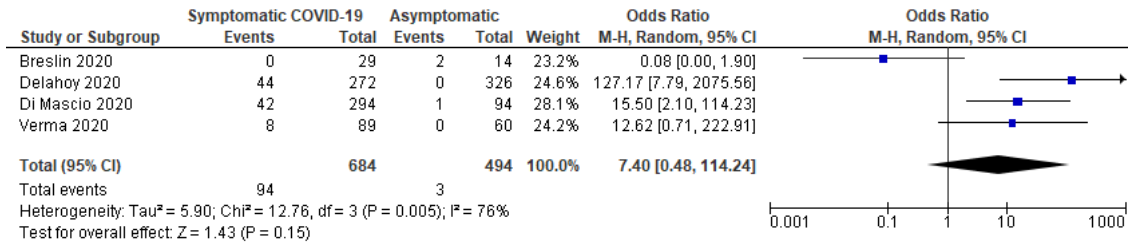

#### 4.2.5. Association of symptomatic COVID-19 with cesarean delivery

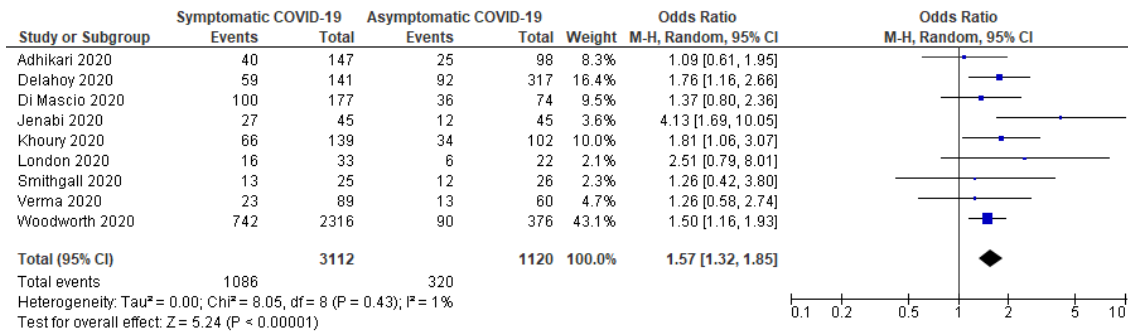

#### 4.2.6. Association of symptomatic COVID-19 with preterm birth

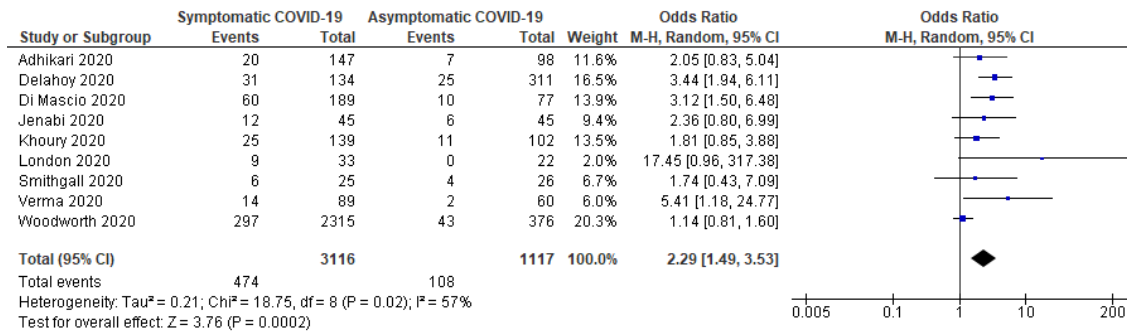

#### 4.2.7. Association of symptomatic COVID-19 with neonatal intensive care unit (NICU) admission

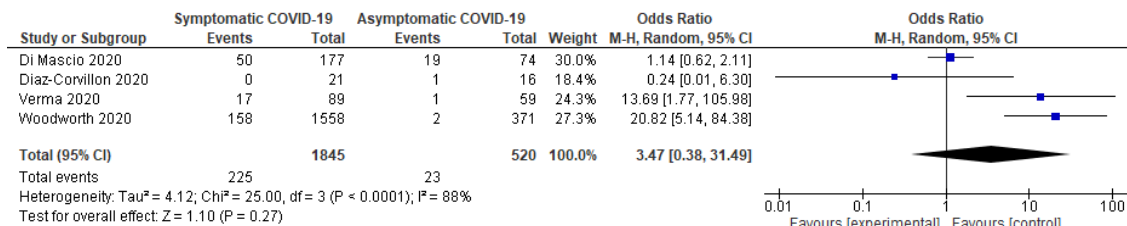

#### 4.2.8. Association of symptomatic COVID-19 with neonatal death

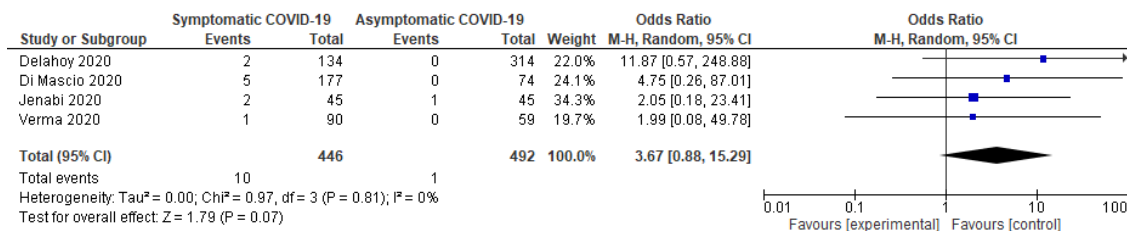



## 4.3 Severe COVID-19 vs mild COVID-19

### 4.3.1. Association of severe COVID-19 with preeclampsia

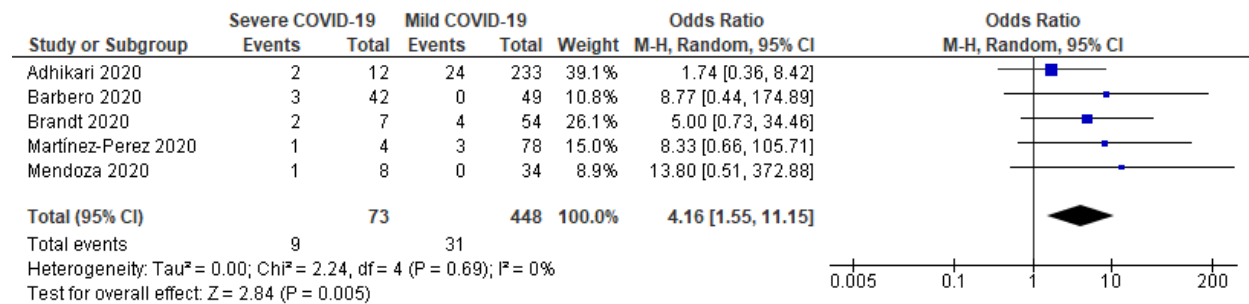

### 4.3.2. Association of severe COVID-19 with gestational diabetes

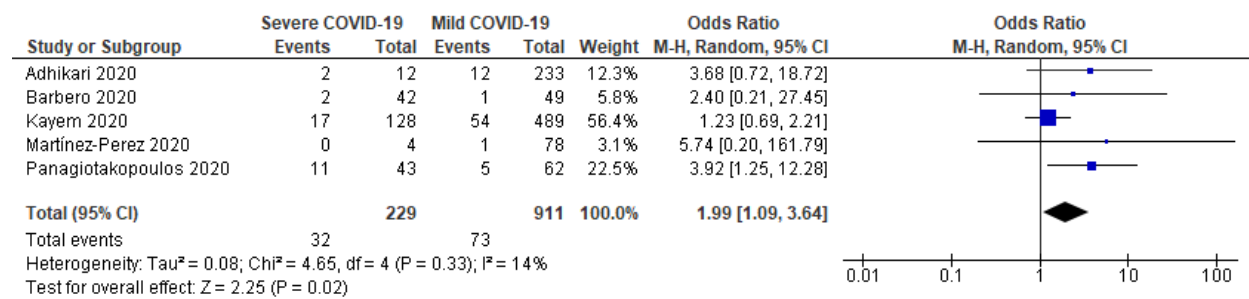

### 4.3.3. Association of severe COVID-19 with abnormal liver function

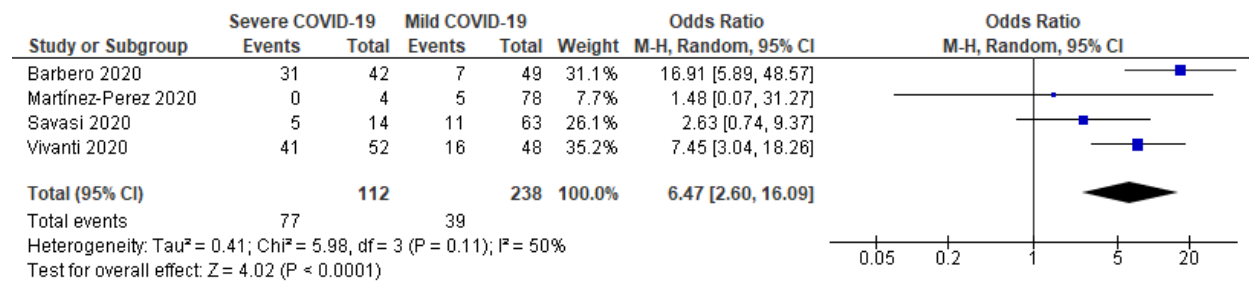

### 4.3.4. Association of severe COVID-19 with lymphopenia

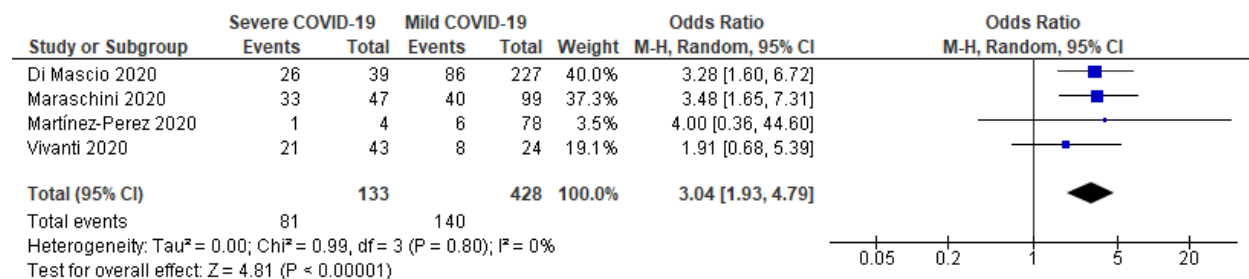

#### 4.3.5. Association of severe COVID-19 with intensive care unit (ICU) admission

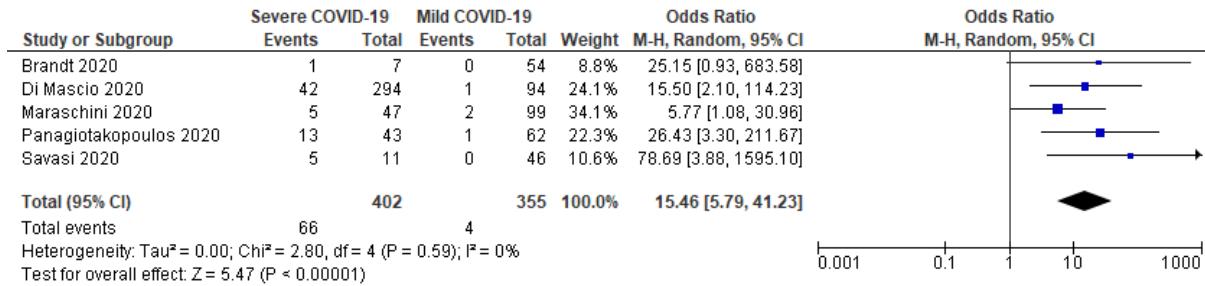

#### 4.3.6. Association of severe COVID-19 with mechanical ventilation

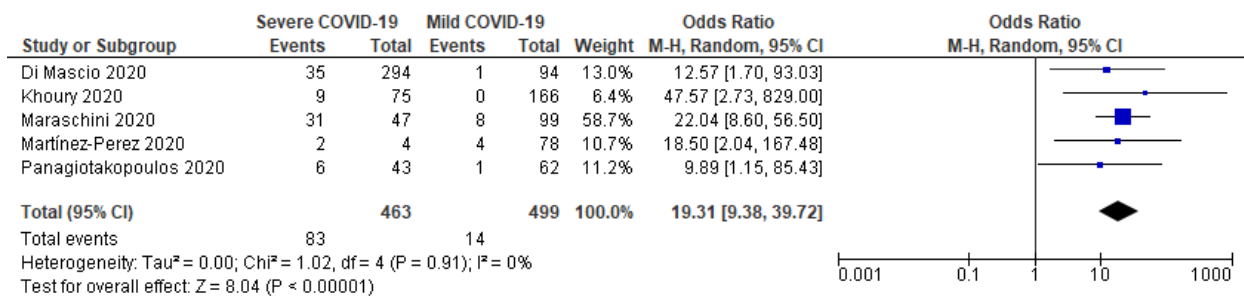

#### 4.3.7. Association of severe COVID-19 with cesarean delivery

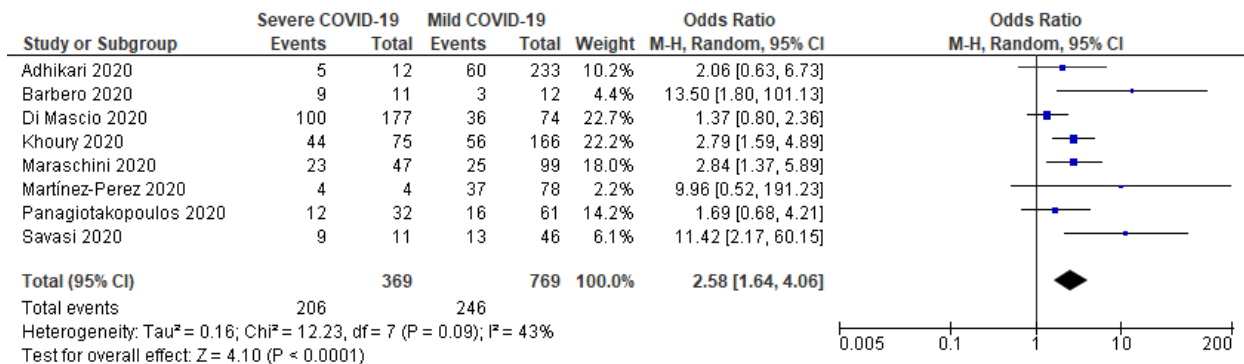

#### 4.3.8. Association of severe COVID-19 with preterm birth

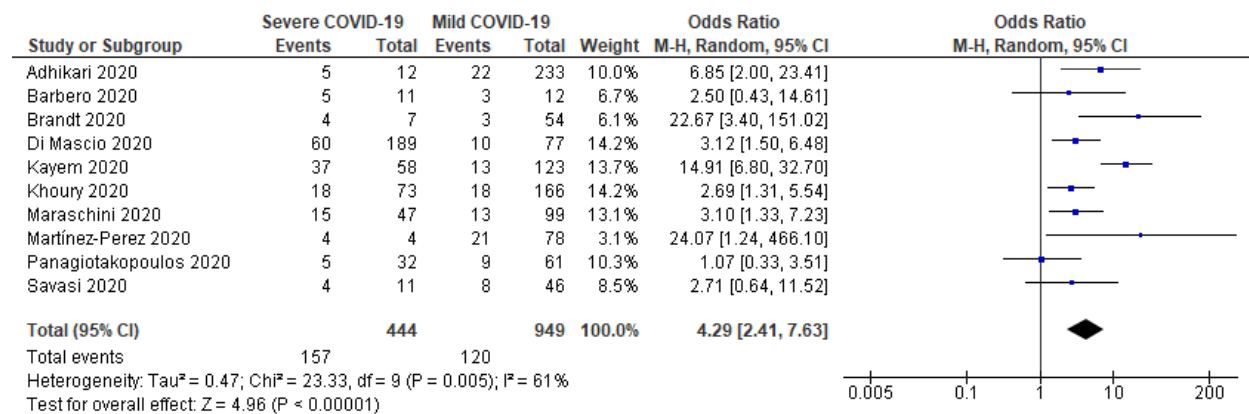

#### 4.3.9. Association of severe COVID-19 with gestational age at birth

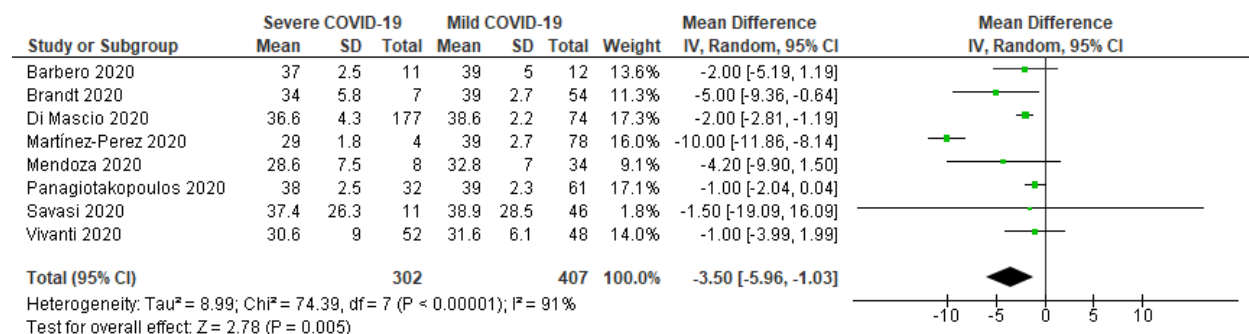

#### 4.3.10. Association of severe COVID-19 with low birth weight

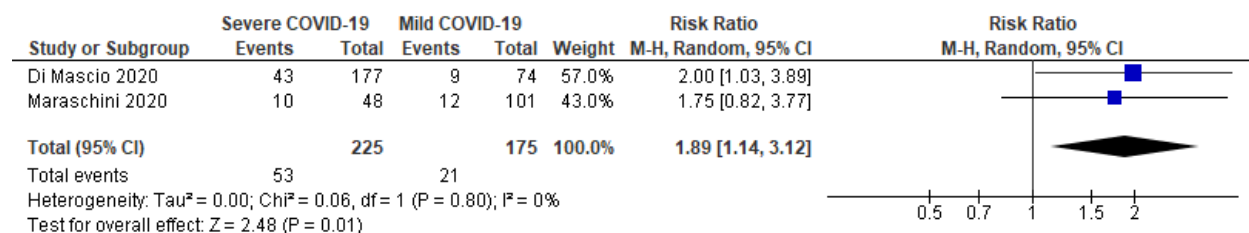

#### 4.3.11. Association of severe COVID-19 with neonatal intensive care unit (NICU) admission

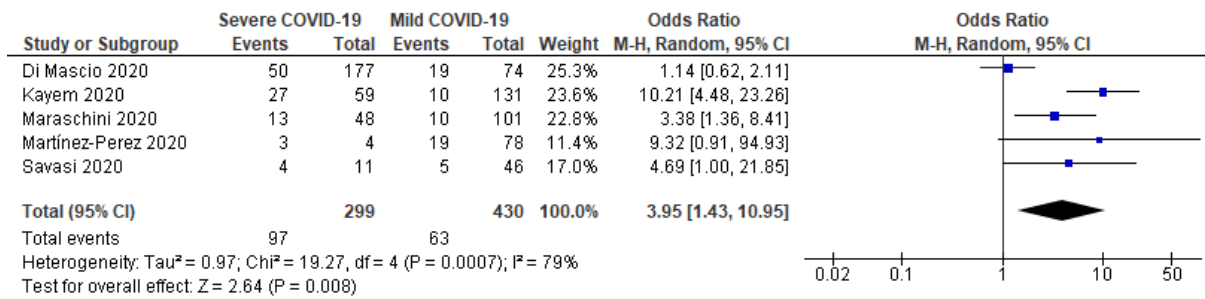

#### 4.3.12. Association of severe COVID-19 with neonatal death

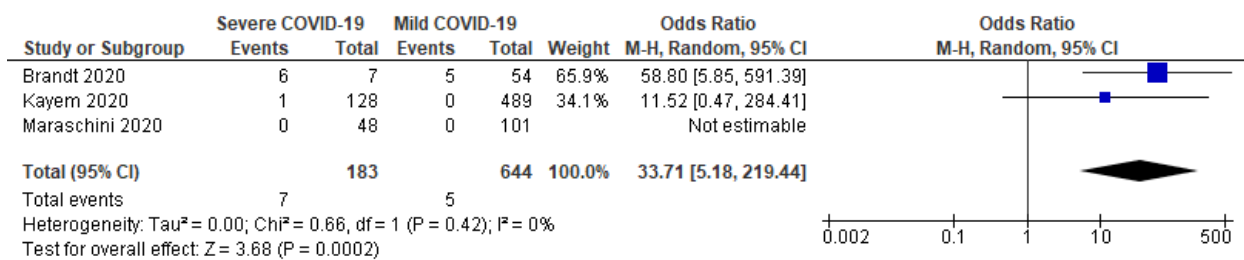

Supplement: 202604-res-4-at.pdf [file 202604-res-4-at.pdf]
